CORRECTION

# Correction: Pooled Sequencing of 531 Genes in Inflammatory Bowel Disease Identifies an Associated Rare Variant in *BTNL2* and Implicates Other Immune Related Genes

The *PLOS Genetics* Staff

The UK IBD Genetics Consortium is listed out of order in the author list. The correct order is:

Natalie J. Prescott<sup>1‡\*</sup>, Benjamin Lehne<sup>1,2‡</sup>, Kristina Stone<sup>1</sup>, James C. Lee<sup>3</sup>, Kirstin Taylor<sup>1</sup>, Jo Knight<sup>1,4,5</sup>, Efterpi Papouli<sup>6</sup>, Muddassar M. Mirza<sup>6</sup>, Michael A. Simpson<sup>1</sup>, Sarah L. Spain<sup>1</sup>, Grace Lu<sup>7</sup>, Franca Fraternali<sup>7</sup>, Suzannah J. Bumpstead<sup>8</sup>, Emma Gray<sup>8</sup>, Ariella Amar<sup>1</sup>, Hannah Bye<sup>1</sup>, Peter Green<sup>1</sup>, UK IBD Genetics Consortium<sup>¶</sup>, Guy Chung-Faye<sup>9</sup>, Bu'Hussain Hayee<sup>9</sup>, Richard Pollok<sup>10</sup>, Jack Satsangi<sup>11</sup>, Miles Parkes<sup>3</sup>, Jeffrey C. Barrett<sup>8</sup>, John C. Mansfield<sup>12</sup>, Jeremy Sanderson<sup>13</sup>, Cathryn M. Lewis<sup>1</sup>, Michael E. Weale<sup>1‡</sup>, Thomas Schlitt<sup>1‡</sup>, Christopher G. Mathew<sup>1,14‡</sup>

**1** Department of Medical and Molecular Genetics, Kings College London, Guy's Hospital, London, United Kingdom, **2** Department of Epidemiology and Biostatistics, Imperial College London, London, United Kingdom, **3** Department of Medicine, University of Cambridge School of Clinical Medicine, Cambridge Biomedical Campus, Cambridge, United Kingdom, **4** Campbell Family Mental Health Research Institute, Centre for Addiction and Mental Health, Toronto, Ontario, Canada, **5** Department of Psychiatry, University of Toronto, Toronto, Ontario, Canada, **6** NIHR GSTFT/KCL Comprehensive Biomedical Research Centre Genomics Core Facility, King's College London School of Medicine, Guy's Hospital, London, United Kingdom, **7** Randall Division of Cell and Molecular Biophysics, King's College London, Guy's Campus, London, United Kingdom, **8** Wellcome Trust Sanger Institute, Wellcome Trust Genome Campus, Hinxton, Cambridge, United Kingdom, **9** Department of Gastroenterology, King's College Hospital NHS Foundation Trust, Denmark Hill, London, United Kingdom, **10** Gastroenterology and Hepatology, St George's Healthcare NHS Trust, Tooting, London, United Kingdom, **11** Gastrointestinal Unit, Molecular Medicine Centre, University of Edinburgh, Western General Hospital, Edinburgh, United Kingdom, **12** Institute of Genetic Medicine, Newcastle University, Newcastle upon Tyne, United Kingdom, **13** Guy's & St Thomas' NHS Foundation Trust, St Thomas' Hospital, Department of Gastroenterology, London, United Kingdom, **14** Division of Medical Biochemistry, University of Cape Town, Cape Town, South Africa

‡ NJP and BL contributed equally to this work. MEW, TS, and CGM also contributed equally to this work.

¶ Membership of the UK IBD Genetics Consortium is listed in the Acknowledgments.

\* E-mail: [natalie.prescott@kcl.ac.uk](mailto:natalie.prescott@kcl.ac.uk)

## Reference

1. Prescott NJ, Lehne B, Stone K, Lee JC, Taylor K, Knight J, et al. (2015) Pooled Sequencing of 531 Genes in Inflammatory Bowel Disease Identifies an Associated Rare Variant in *BTNL2* and Implicates Other Immune Related Genes. *PLoS Genet* 11(2): e1004955. doi: [10.1371/journal.pgen.1004955](https://doi.org/10.1371/journal.pgen.1004955) PMID: [25671699](https://pubmed.ncbi.nlm.nih.gov/25671699/)

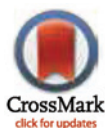

## OPEN ACCESS

**Citation:** The *PLOS Genetics* Staff (2015) Correction: Pooled Sequencing of 531 Genes in Inflammatory Bowel Disease Identifies an Associated Rare Variant in *BTNL2* and Implicates Other Immune Related Genes. *PLoS Genet* 11(4): e1005172. doi:10.1371/journal.pgen.1005172

**Published:** April 17, 2015

**Copyright:** © 2015 The PLOS Genetics Staff. This is an open access article distributed under the terms of the [Creative Commons Attribution License](https://creativecommons.org/licenses/by/4.0/), which permits unrestricted use, distribution, and reproduction in any medium, provided the original author and source are credited.
